# Supplementary material
Source: PubMed Central journal article supplement (PMC6196723)
Supplement: NIHMS951468-supplement-2.pdf [file NIHMS951468-supplement-2.pdf]

# Test Results

Order #: **2015086539**

Indiana University  
(IUPUI-IB 008)  
Medical Research & Library  
IB 008  
975 W Walnut Street  
Indianapolis, IN 46202 USA  
Attn: Robin Crisler

Charles River Research Animal Diagnostic Services  
(CR RADS)  
261 Ballardvale Street  
Receiving Dock, Bldg 22  
Wilmington MA 01887 USA

## Billing Information

### Payment Method

Standing Purchase PO#: 1419335  
Order Exp. 12/2015

Indiana University  
Room 021  
400 E 7th Street  
Bloomington, IN 47405 USA

## Details

Sample(s) from: Multiple locations

| Collection Date | Scheduled Ship Date | Arrival Date | Approval Date |
|-----------------|---------------------|--------------|---------------|
| 02-Sep-2015     | 04-Sep-2015         | 08-Sep-2015  | 09-Sep-2015   |

## Diagnostic Summary

| Test                 | Colony | Tested | + | +/- | ? | PDG |
|----------------------|--------|--------|---|-----|---|-----|
| All results NEGATIVE |        |        |   |     |   |     |

+ = Positive, +/- = Equivocal, ? = Indeterminate, PDG = Pending

To assure the SPF status of your research animal colonies, it is essential that you understand the sources, pathobiology, diagnosis and control of pathogens and other adventitious infectious agents that may cause research interference. We have summarized this important information in infectious agent **Technical Sheets**, which you can view by visiting [http://www.criver.com/info/disease\\_sheets](http://www.criver.com/info/disease_sheets).

# Test Results

Order #: 2015086539

Indiana University  
(IUPUI-IB 008)  
Medical Research & Library  
IB 008  
975 W Walnut Street  
Indianapolis, IN 46202 USA  
Attn: Robin Crisler

Charles River Research Animal Diagnostic Services  
(CR RADS)  
261 Ballardvale Street  
Receiving Dock, Bldg 22  
Wilmington MA 01887 USA

## Molecular Diagnostics: Infectious Disease PCR

Results approved by Magan, Kyria on 09 Sep 2015\*

### IUPUI Mouse Prevalent PRIA

|                                     | <u>1</u><br>IB | <u>2</u><br>IB | <u>3</u><br>IB | <u>4</u><br>IB | <u>27</u><br>IB |
|-------------------------------------|----------------|----------------|----------------|----------------|-----------------|
|                                     | 11D/11L/11R    | 29A PRIA       | 29E/30/32 P    | 31/33/49U P    | 29C/29D PR      |
| <b>MHV PCR</b>                      | -              | -              | -              | -              | -               |
| <b>Mouse Parvovirus (MPV/MVM) P</b> | -              | -              | -              | -              | -               |
| <b>MRV (EDIM) PCR</b>               | -              | -              | -              | -              | -               |
| <b>TMEV/GDVII PCR</b>               | -              | -              | -              | -              | -               |
| <b>MAV 1 &amp; 2 PCR</b>            | -              | -              | -              | -              | -               |
| <b>Mousepox (Ectromelia) PCR</b>    | -              | -              | -              | -              | -               |
| <b>Pinworm PCR</b>                  | -              | -              | -              | -              | -               |
| <b>Mite PCR</b>                     | -              | -              | -              | -              | -               |

#### Remarks

- = Negative, +/- = Equivocal; + = Positive; I = Inconclusive.

An equivocal result indicates inconsistent amplification detected by real-time PCR.

Inconclusive indicates failure of control result.

Nucleic Acid Recovery Control (NRC)/Inhibition Control: A low copy exogenous nucleic acid was added to sample lysis prior to nucleic acid isolation to serve as both a control to monitor for nucleic acid recovery and PCR inhibition. An RNA NRC also monitors reverse transcription for RNA virus assays. Nucleic acid recovery and PCR inhibition is monitored by a PCR assay specific for the NRC template. Unless otherwise stated, the control results passed for this order.

Any samples reported as equivocal or positive result in this report has been confirmed by re-extracting nucleic acid and repeating real-time PCR amplification to confirm the initial testing result.

If this report contains an unexpected result, we strongly recommend that you call our Technical Services Dept (800.338.9680) before taking any action. Additional or alternative testing may be essential to reaching an accurate diagnosis. We will be glad to test newly submitted samples up to the number of unexpected results in this order.

\*This report has been electronically signed by laboratory personnel. The name of the individual who approved these results appears in the header of this service report.

# Test Results

Order #: **2015086539**

Indiana University  
 (IUPUI-IB 008)  
 Medical Research & Library  
 IB 008  
 975 W Walnut Street  
 Indianapolis, IN 46202 USA  
 Attn: Robin Crisler

Charles River Research Animal Diagnostic Services  
 (CR RADS)  
 261 Ballardvale Street  
 Receiving Dock, Bldg 22  
 Wilmington MA 01887 USA

## Serology

Results approved by Kudalis, Diane on 08 Sep 2015\*

|                    | <u>5</u><br>IB<br>11R: M1 | <u>6</u><br>IB<br>11S: M1 | <u>7</u><br>IB<br>12: M1+2 | <u>8</u><br>IB<br>12: M3+4 | <u>9</u><br>IB<br>12: M5 | <u>10</u><br>IB<br>29A: M1+2 | <u>11</u><br>IB<br>29A: M3+4 | <u>12</u><br>IB<br>29A: M5+6 | <u>13</u><br>IB<br>29A: M7 | <u>14</u><br>IB<br>29E: M1+2 |
|--------------------|---------------------------|---------------------------|----------------------------|----------------------------|--------------------------|------------------------------|------------------------------|------------------------------|----------------------------|------------------------------|
| MFIA SEND          | -                         | -                         | -                          | -                          | -                        | -                            | -                            | -                            | -                          | -                            |
| MFIA PVM           | -                         | -                         | -                          | -                          | -                        | -                            | -                            | -                            | -                          | -                            |
| MFIA MHV           | -                         | -                         | -                          | -                          | -                        | -                            | -                            | -                            | -                          | -                            |
| MFIA MVM           | -                         | -                         | -                          | -                          | -                        | -                            | -                            | -                            | -                          | -                            |
| MFIA MPV-1         | -                         | -                         | -                          | -                          | -                        | -                            | -                            | -                            | -                          | -                            |
| MFIA MPV-2         | -                         | -                         | -                          | -                          | -                        | -                            | -                            | -                            | -                          | -                            |
| MFIA NS-1          | -                         | -                         | -                          | -                          | -                        | -                            | -                            | -                            | -                          | -                            |
| MFIA GDVII         | -                         | -                         | -                          | -                          | -                        | -                            | -                            | -                            | -                          | -                            |
| MFIA REO           | -                         | -                         | -                          | -                          | -                        | -                            | -                            | -                            | -                          | -                            |
| MFIA EDIM (ROTA-A) | -                         | -                         | -                          | -                          | -                        | -                            | -                            | -                            | -                          | -                            |
| MFIA LCMV          | -                         | -                         | -                          | -                          | -                        | -                            | -                            | -                            | -                          | -                            |
| MFIA MAV 1 & 2     | -                         | -                         | -                          | -                          | -                        | -                            | -                            | -                            | -                          | -                            |
| MFIA ECTRO         | -                         | -                         | -                          | -                          | -                        | -                            | -                            | -                            | -                          | -                            |
| MFIA MPUL          | -                         | -                         | -                          | -                          | -                        | -                            | -                            | -                            | -                          | -                            |
| MFIA CPIL          | -                         | -                         | -                          | -                          | -                        | -                            | -                            | -                            | -                          | -                            |
| MFIA Anti-Ig       | <b>P</b>                  | <b>P</b>                  | <b>P</b>                   | <b>P</b>                   | <b>P</b>                 | <b>P</b>                     | <b>P</b>                     | <b>P</b>                     | <b>P</b>                   | <b>P</b>                     |

|                    | <u>15</u><br>IB<br>29E: M3+4 | <u>16</u><br>IB<br>29E: M5+6 | <u>17</u><br>IB<br>30: M1+2 | <u>18</u><br>IB<br>31: M1+2 | <u>19</u><br>IB<br>31: M3+4 | <u>20</u><br>IB<br>31: M5 | <u>21</u><br>IB<br>32: M1+2 | <u>22</u><br>IB<br>33: M1+2 | <u>23</u><br>IB<br>33: M3+4 | <u>24</u><br>IB<br>11D: M1 |
|--------------------|------------------------------|------------------------------|-----------------------------|-----------------------------|-----------------------------|---------------------------|-----------------------------|-----------------------------|-----------------------------|----------------------------|
| MFIA SEND          | -                            | -                            | -                           | -                           | -                           | -                         | -                           | -                           | -                           | -                          |
| MFIA PVM           | -                            | -                            | -                           | -                           | -                           | -                         | -                           | -                           | -                           | -                          |
| MFIA MHV           | -                            | -                            | -                           | -                           | -                           | -                         | -                           | -                           | -                           | -                          |
| MFIA MVM           | -                            | -                            | -                           | -                           | -                           | -                         | -                           | -                           | -                           | -                          |
| MFIA MPV-1         | -                            | -                            | -                           | -                           | -                           | -                         | -                           | -                           | -                           | -                          |
| MFIA MPV-2         | -                            | -                            | -                           | -                           | -                           | -                         | -                           | -                           | -                           | -                          |
| MFIA NS-1          | -                            | -                            | -                           | -                           | -                           | -                         | -                           | -                           | -                           | -                          |
| MFIA GDVII         | -                            | -                            | -                           | -                           | -                           | -                         | -                           | -                           | -                           | -                          |
| MFIA REO           | -                            | -                            | -                           | -                           | -                           | -                         | -                           | -                           | -                           | -                          |
| MFIA EDIM (ROTA-A) | -                            | -                            | -                           | -                           | -                           | -                         | -                           | -                           | -                           | -                          |
| MFIA LCMV          | -                            | -                            | -                           | -                           | -                           | -                         | -                           | -                           | -                           | -                          |
| MFIA MAV 1 & 2     | -                            | -                            | -                           | -                           | -                           | -                         | -                           | -                           | -                           | -                          |
| MFIA ECTRO         | -                            | -                            | -                           | -                           | -                           | -                         | -                           | -                           | -                           | -                          |
| MFIA MPUL          | -                            | -                            | -                           | -                           | -                           | -                         | -                           | -                           | -                           | -                          |
| MFIA CPIL          | -                            | -                            | -                           | -                           | -                           | -                         | -                           | -                           | -                           | -                          |
| MFIA Anti-Ig       | <b>P</b>                     | <b>P</b>                     | <b>P</b>                    | <b>P</b>                    | <b>P</b>                    | <b>P</b>                  | <b>P</b>                    | <b>P</b>                    | <b>P</b>                    | <b>P</b>                   |

# Test Results

Order #: **2015086539**

Indiana University  
(IUPUI-IB 008)  
Medical Research & Library  
IB 008  
975 W Walnut Street  
Indianapolis, IN 46202 USA  
Attn: Robin Crisler

Charles River Research Animal Diagnostic Services  
(CR RADS)  
261 Ballardvale Street  
Receiving Dock, Bldg 22  
Wilmington MA 01887 USA

## Serology

Results approved by Kudalis, Diane on 08 Sep 2015\*

|                           | <u>25</u><br>IB<br>11L: M1 | <u>26</u><br>IB<br>49U: M1 | <u>28</u><br>IB<br>29C: M1+2 | <u>29</u><br>IB<br>29C: M3+4 | <u>30</u><br>IB<br>29C: M5+6 | <u>31</u><br>IB<br>29D: M1+2 | <u>32</u><br>IB<br>29D: M3+4 | <u>33</u><br>IB<br>29D: M5 |
|---------------------------|----------------------------|----------------------------|------------------------------|------------------------------|------------------------------|------------------------------|------------------------------|----------------------------|
| <b>MFIA SEND</b>          | -                          | -                          | -                            | -                            | -                            | -                            | -                            | -                          |
| <b>MFIA PVM</b>           | -                          | -                          | -                            | -                            | -                            | -                            | -                            | -                          |
| <b>MFIA MHV</b>           | -                          | -                          | -                            | -                            | -                            | -                            | -                            | -                          |
| <b>MFIA MVM</b>           | -                          | -                          | -                            | -                            | -                            | -                            | -                            | -                          |
| <b>MFIA MPV-1</b>         | -                          | -                          | -                            | -                            | -                            | -                            | -                            | -                          |
| <b>MFIA MPV-2</b>         | -                          | -                          | -                            | -                            | -                            | -                            | -                            | -                          |
| <b>MFIA NS-1</b>          | -                          | -                          | -                            | -                            | -                            | -                            | -                            | -                          |
| <b>MFIA GDVII</b>         | -                          | -                          | -                            | -                            | -                            | -                            | -                            | -                          |
| <b>MFIA REO</b>           | -                          | -                          | -                            | -                            | -                            | -                            | -                            | -                          |
| <b>MFIA EDIM (ROTA-A)</b> | -                          | -                          | -                            | -                            | -                            | -                            | -                            | -                          |
| <b>MFIA LCMV</b>          | -                          | -                          | -                            | -                            | -                            | -                            | -                            | -                          |
| <b>MFIA MAV 1 &amp; 2</b> | -                          | -                          | -                            | -                            | -                            | -                            | -                            | -                          |
| <b>MFIA ECTRO</b>         | -                          | -                          | -                            | -                            | -                            | -                            | -                            | -                          |
| <b>MFIA MPUL</b>          | -                          | -                          | -                            | -                            | -                            | -                            | -                            | -                          |
| <b>MFIA CPIL</b>          | -                          | -                          | -                            | -                            | -                            | -                            | -                            | -                          |
| <b>MFIA Anti-Ig</b>       | <b>P</b>                   | <b>P</b>                   | <b>P</b>                     | <b>P</b>                     | <b>P</b>                     | <b>P</b>                     | <b>P</b>                     | <b>P</b>                   |

Serology Profile: IUPUI Mouse Assessment Profile

### Remarks

MFIA/IFA/ELISA/WIB Results: - = Negative; +/- = Equivocal; + = Moderate to strong positive; TC = Non-specific reaction with tissue control; I = Indeterminate or Inconclusive; IN = result interpreted as non-specific because not confirmed by alternative serologic assay or diagnostic methodology for other serologic assays, PDG = pending, QNS = Quantity not sufficient. The anti-immunoglobulin (Anti-Ig) MFIA verifies that a serum specimen contains a sufficient concentration of immunoglobulin to be suitable for serologic testing. A result of P (for Pass) corresponds to a median fluorescence index (MFI) at or above the Anti-Ig assay cutoff (typically  $\geq 7000$  or higher). An Anti-Ig assay result of F (for Fail), assigned if the MFI is below the cutoff, might occur because the sample was received too dilute, was collected from an immunocompromised host or was from a species other than the one for which the MFIA is intended. If a sample fails the Anti-Ig MFIA, then negative and borderline results in MFIA for microbial antibodies are considered I (for inconclusive).

\*This report has been electronically signed by laboratory personnel. The name of the individual who approved these results appears in the header of this service report.

# Test Results

Order #: 2015086539

Indiana University  
(IUPUI-IB 008)  
Medical Research & Library  
IB 008  
975 W Walnut Street  
Indianapolis, IN 46202 USA  
Attn: Robin Crisler

Charles River Research Animal Diagnostic Services  
(CR RADS)  
261 Ballardvale Street  
Receiving Dock, Bldg 22  
Wilmington MA 01887 USA

## Sample Information

| Number | Code                       | Species | Colony            |
|--------|----------------------------|---------|-------------------|
| 1      | IB 11D/11L/11R/11S/12 PRIA | Mouse   | n/d               |
| 2      | IB 29A PRIA                | Mouse   | n/d               |
| 3      | IB 29E/30/32 PRIA          | Mouse   | n/d               |
| 4      | IB 31/33/49U PRIA          | Mouse   | n/d               |
| 5      | IB 11R: M1                 | Mouse   | 11R Sentinel Mice |
| 6      | IB 11S: M1                 | Mouse   | 11S Sentinel Mice |
| 7      | IB 12: M1+2                | Mouse   | 12 Sentinel Mice  |
| 8      | IB 12: M3+4                | Mouse   | 12 Sentinel Mice  |
| 9      | IB 12: M5                  | Mouse   | 12 Sentinel Mice  |
| 10     | IB 29A: M1+2               | Mouse   | 29A Sentinel Mice |
| 11     | IB 29A: M3+4               | Mouse   | 29A Sentinel Mice |
| 12     | IB 29A: M5+6               | Mouse   | 29A Sentinel Mice |
| 13     | IB 29A: M7                 | Mouse   | 29A Sentinel Mice |
| 14     | IB 29E: M1+2               | Mouse   | 29E Sentinel Mice |
| 15     | IB 29E: M3+4               | Mouse   | 29E Sentinel Mice |
| 16     | IB 29E: M5+6               | Mouse   | 29E Sentinel Mice |
| 17     | IB 30: M1+2                | Mouse   | 30 Sentinel Mice  |
| 18     | IB 31: M1+2                | Mouse   | 31 Sentinel Mice  |
| 19     | IB 31: M3+4                | Mouse   | 31 Sentinel Mice  |
| 20     | IB 31: M5                  | Mouse   | 31 Sentinel Mice  |
| 21     | IB 32: M1+2                | Mouse   | 32 Sentinel Mice  |
| 22     | IB 33: M1+2                | Mouse   | 33 Sentinel Mice  |
| 23     | IB 33: M3+4                | Mouse   | 33 Sentinel Mice  |
| 24     | IB 11D: M1                 | Mouse   | n/d               |
| 25     | IB 11L: M1                 | Mouse   | n/d               |
| 26     | IB 49U: M1                 | Mouse   | n/d               |
| 27     | IB 29C/29D PRIA            | Mouse   | n/d               |
| 28     | IB 29C: M1+2               | Mouse   | 29C Sentinel Mice |
| 29     | IB 29C: M3+4               | Mouse   | 29C Sentinel Mice |
| 30     | IB 29C: M5+6               | Mouse   | 29C Sentinel Mice |
| 31     | IB 29D: M1+2               | Mouse   | 29D Sentinel Mice |
| 32     | IB 29D: M3+4               | Mouse   | 29D Sentinel Mice |
| 33     | IB 29D: M5                 | Mouse   | 29D Sentinel Mice |

**Indiana University School of Medicine  
Laboratory Animal Resource Center  
Necropsy Report**

Date processed: 02 Sept 2015  
LARC Accession No.: NA  
CRL Accession No: 2015086539  
Histopathology Accession No(s): NA  
Facility: **IB**

Investigator: Hickman  
Species: Mice  
Strain: ICR  
Age: ~4 mo. Sex: Female  
Date of Final Report: 09 Sept 2015

**History:** Sentinels were received from a commercial vendor and exposed for approximately 12 weeks to dirty bedding at a dilution ratio of one sentinel per 70-90 colony cages. Sentinels were processed for serology, PCR, gross necropsy, and parasitology. Results are reflected below and represent findings for all mouse sentinels from IB. Please refer to the Charles River Laboratory Report for rooms tested which are reflected in the sample ID name.

**Serology and PCR Evaluation Results:** Negative- Please see Charles River Laboratory results #

Serology Interpretation: Whole blood from up to 2 sentinel mice from the same room were pooled in each EZ Spot serology test.

PCR Interpretation: Feces or swabs applied to pelage were taken from sentinel mice and pooled together (up to 10 swabs or up to 10 fecal pellets, respectively) in the same test. One test may represent samples from more than one room at the facility.

**Gross Necropsy findings:**

| Category                                                                                                                                                       | Animal Identification | Findings               |
|----------------------------------------------------------------------------------------------------------------------------------------------------------------|-----------------------|------------------------|
| General Appearance, Skin & Appendages, Cardiovascular & Respiratory Systems, Urogenital System, Digestive System, Lymphatic & Endocrine System, Nervous System | All THE ABOVE         | No significant lesions |

**Parasitology Results:**

| Animal Identification | Test Site & Type                     | Result   |
|-----------------------|--------------------------------------|----------|
| All                   | Direct exam of cecal contents        | Negative |
| All                   | Microscopic exam of pelt & fur pluck | Negative |

**Conclusion: No evidence of infectious disease of significance was found based on the testing methods used and dirty bedding sentinel system in place.**

Please contact the Facility Veterinarian for IB, Dr. Nancy Johnston, DVM, if you have questions. 317-274-8242 or [johnstna@iu.edu](mailto:johnstna@iu.edu). For questions about testing or methodology, contact Dr. Johnston or Dr. Robin Crisler at 317-278-0251 or [crisler@iupui.edu](mailto:crisler@iupui.edu).
